# Supplementary material
Source: PubMed Central journal article supplement (PMC3989605)
Supplement: embj0033-0101-sd2.pdf [file embj0033-0101-sd2.pdf]

## **Supplemental Information**

### **PIAS1 SUMO ligase regulates the self-renewal and differentiation of hematopoietic stem cell**

Bin Liu, Kathleen M. Yee, Samuel Tahk, Ryan Mackie, Cary Hsu and Ke Shuai

#### **Supplementary information includes:**

Supplementary Materials and Methods

Supplementary Figures S1-S5

Supplementary Figure legends

Supplementary References

## Supplementary Materials and Methods

### Mice and Reagents

The generation of *Pias1*<sup>-/-</sup> mice has been described (Liu et al., 2004). C57S/JL (CD45.1) mice were purchased from the Jackson Labs.

The following antibodies were purchased from BioLegend: fluorescein isothiocyanate (FITC)-conjugated anti-IgM (RMM-1), anti-Mac1 (CD11b; M1/70), anti-CD3 (145-2C11), anti-CD4 (RM4-5), anti-Sca1 (D7); phycoerythrin (PE)-conjugated anti-B220 (CD45R; RA3-6B2), anti-GR1 (Ly-6G/Ly-6C; RB6-8C5), anti-Mac1 (M1/70), anti-CD11c (N418), anti-Ter119 (TER119), anti-NK-1.1 (PE136), anti-CD5 (53-7.3), anti-CD8a (53-6.7), anti-IL7Ra (CD127; SB/199); Alexa Fluor 647-conjugated anti-IL7Ra (CD127; SB/199); Pacific Blue-conjugated anti-CD48 (HM48-1); allophycocyanin (APC)-conjugated anti-FCgRII/III (CD16/32; 93), anti-CD45.2 (104); PE/Cy7-conjugated anti-FCgRII/III (CD16/32; 93); PerCP-conjugated anti-CD45.1 (A20); PE/Cy5-conjugated anti-Sca1 (D7), anti-CD34 (MEC14.7); APC/Cy7-conjugated anti-c-Kit (2B8); and isotype controls. PE-conjugated anti-CD4 (GK1.5) and Alexa Fluor 488-conjugated anti-Ki67 (B56) are from BD Pharmingen. APC-conjugated anti-CD150 (mShad150) is from eBioscience.

### Flow cytometry analysis and sorting of HSC and progenitors

Various cell populations are defined as the following: common lymphoid progenitors (CLP): Lin<sup>-</sup> Sca1<sup>low</sup> c-Kit<sup>low</sup> IL7Ra<sup>+</sup>; common myeloid progenitors (CMP): Lin<sup>-</sup> Sca1<sup>-</sup> c-Kit<sup>+</sup> CD34<sup>+</sup> FcgRII/III<sup>low</sup>; granulocyte monocyte progenitors (GMP): Lin<sup>-</sup> Sca1<sup>-</sup> c-Kit<sup>+</sup> CD34<sup>+</sup> FcgRII/III<sup>+</sup>; megakaryocyte erythrocyte progenitors (MEP): Lin<sup>-</sup> Sca1<sup>-</sup> c-Kit<sup>+</sup> CD34<sup>-</sup> FcgRII/III<sup>-</sup>; Pro-B, Lin<sup>-</sup> IgM<sup>-</sup> B220<sup>+</sup> CD43<sup>+</sup>; Pre-B, Lin<sup>-</sup> IgM<sup>-</sup> B220<sup>+</sup> CD43<sup>-</sup>; LSK: Lin<sup>-</sup> Sca1<sup>+</sup> c-Kit<sup>+</sup>; long-term hematopoietic stem cells (LT-HSC): Lin<sup>-</sup> Sca1<sup>+</sup> c-Kit<sup>+</sup> CD34<sup>-</sup> and short-term multi-potent progenitors (ST/MPP): Lin<sup>-</sup> Sca1<sup>+</sup> c-Kit<sup>+</sup> CD34<sup>+</sup>. Dormant hematopoietic stem cells (d-HSC) are defined as Lin<sup>-</sup> Sca1<sup>+</sup> c-Kit<sup>+</sup> CD48<sup>-</sup> CD34<sup>-</sup> CD150<sup>+</sup>. Lineage markers include CD3, CD4, CD5, CD8a, B220, GR1, Mac1 and Ter119, except that only CD3, CD4, CD8a and GR1 were used for Pro-B and Pre-B populations.

### Short term competitive reconstitution assays

Short term competitive reconstitution assays were performed as described with slight modifications (Yang et al., 2005). Briefly, FACS-sorted myeloid-restricted Lin<sup>-</sup> Sca1<sup>-</sup> cKit<sup>+</sup> (L<sup>-</sup>S<sup>-</sup>K<sup>+</sup>) cells (10,000) from WT or *Pias1*<sup>-/-</sup> littermates (CD45.2<sup>+</sup>) were mixed with 2x10<sup>5</sup> of WT C57S/JL bone marrow (BM) cells (CD45.1<sup>+</sup>) and injected into lethally irradiated WT C57S/JL mice. The percentage of myeloid cells (Mac1<sup>+</sup>) from donor mice in peripheral blood (PBL), BM and spleen were assayed by flow cytometry 13 days post reconstitution.

### Primer sequences

The following primers for murine genes are used for Q-PCR:

*Hprt1*-f: 5' - CAGTACAGCCCCAAAATGGT  
*Hprt1*-r: 3' - CAAGGGCATATCCAACAACA

*Gata1*-f: 5'- AGCAACGGCTACTCCACTGT  
*Gata1*-r: 5'- TGCTGACAATCATTCGCTTC

*Gata2*-f: 5'- GATACCCACCTATCCCTCCTATGTG  
*Gata2*-r: 3'- GTGGCACCACAGTTGACACACTC

*Csf1r*-f: 5'- CTTTGGTCTGGGCAAAGAAGAT  
*Csf1r*-r: 5'- CAGGGCCTCCTTCTCATCAG

*Mpo*-f: 5'- GTTCCGCCTGAACAATCAGT  
*Mpo*-r: 5'- ATTCAGTTTGGCTGGAGTGG

*Cebpa*-f: 5'- CAAGAACAGCAACGAGTACCG  
*Cebpa*-r: 3'- GTCACTGGTCAACTCCAGCAC

*Ikzf1*-f: 5'- CACAACGAGATGGCAGAAGA  
*Ikzf1*-r: 3'- CTGACAGGCACTTGTCTCCA

*Gata3*-f: 5'- CTACCGGGTTCGGATGTAAGTC  
*Gata3*-r: 5'- GTTACACACTCCCTGCCTTCT

*Il7r*-f: 5'- TGGCTCTGGGTAGAGCTTTC  
*Il7r*-r: 5'- GTGGCACCAGAAGGAGTGAT

*Ebf1*-f: 5'- CGGAAATCCAACCTTCTTCCA  
*Ebf1*-r: 5'- GTCTTTTCGCTGTTGGCTTC

*Pax5*-f: 5'- AACTTGCCCATCAAGGTGTC  
*Pax5*-r: 5'- GGCTTGATGCTTCTGTCTC

*Igll1*-f: 5'- GAGCTTCAGTGGGAAGCAAC  
*Igll1*-r: 5'- CCCACCACCAAAGACATACC

*Epor*-f: 5'- TGTCTCCTACTTGCTGGGGC  
*Epor*-r: 5'- CAAGCGTTGGGTGAAGCACA

*Hbb-b1*-f: 5'- AACGATGGCCTGAATCACTT  
*Hbb-b1*-r: 5'- ACGATCATATTGCCAGGAG

*Slc4a1*-f: 5'- CCTCATCCTCACAGTGCCTC  
*Slc4a1*-r: 5'- CAGGCCATTCTCCTCGTCAA

*Pias1*-f: 5'- CATCAACACCTCCCTCATCC  
*Pias1*-r: 5'- CCTCCTGCACTTAGCTGGTC

The following primers are used for bisulfite sequencing:

*Gata1*-f: 5'- TTTATTTTAATTTTTTGGGATTTTTTAGG  
*Gata1*-r: 5'- AACTACAAACCACCTCTATAAAACAATCTA

The following primers are used for Chromatin immunoprecipitation (ChIP):

*Gata1* promoter-f: 5'- ACCTGCAAAATGGGTACAGC  
*Gata1* promoter-r: 5'- TTCAGTGAGGAAAGCCCCTA

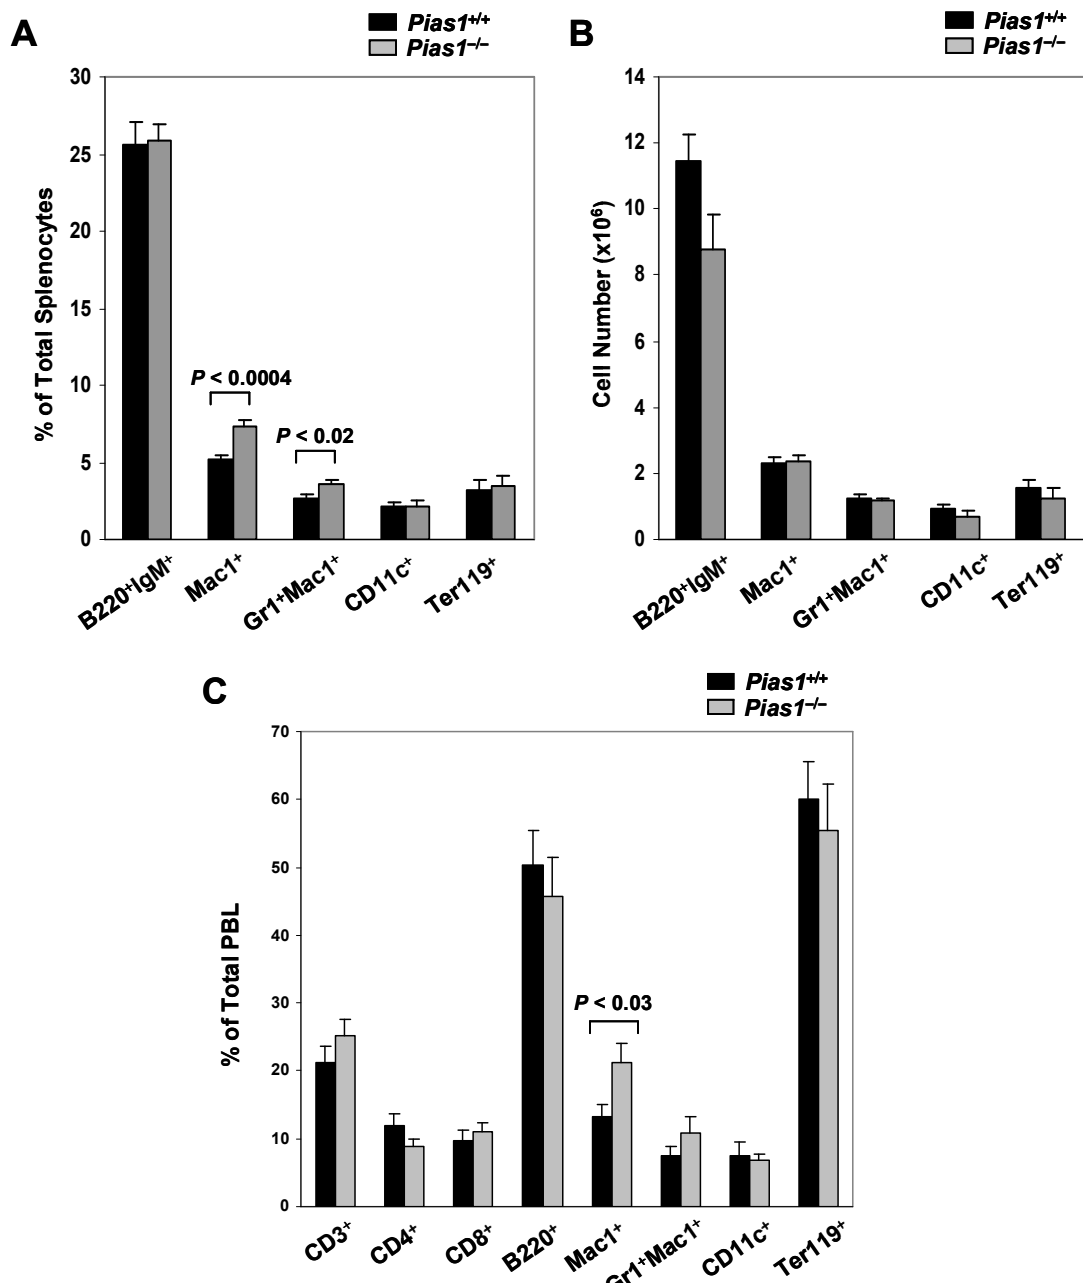

**Figure S1.** Normal peripheral lineage differentiation in *Pias1*<sup>-/-</sup> mice. **(A)** Frequencies of mature B cells (B220<sup>+</sup>IgM<sup>+</sup>), myeloid cells (Mac1<sup>+</sup>), granulocyte/monocyte lineage (Gr1<sup>+</sup>Mac1<sup>+</sup>), dendritic cells (CD11c<sup>+</sup>) and erythroid cells (Ter119<sup>+</sup>) in freshly isolated splenocytes from 8-12 weeks old WT and *Pias1*<sup>-/-</sup> littermates were assayed by flow cytometry. **(B)** Same as in **A** except that cell numbers of each population were presented. **(C)** Same as in **A** except that peripheral blood lymphocytes (PBL) were analyzed. Shown in each panel is a pool of 3 independent experiments (n=9-13). Error bars represent SEM. *P* values were determined by non-paired *t*-test.

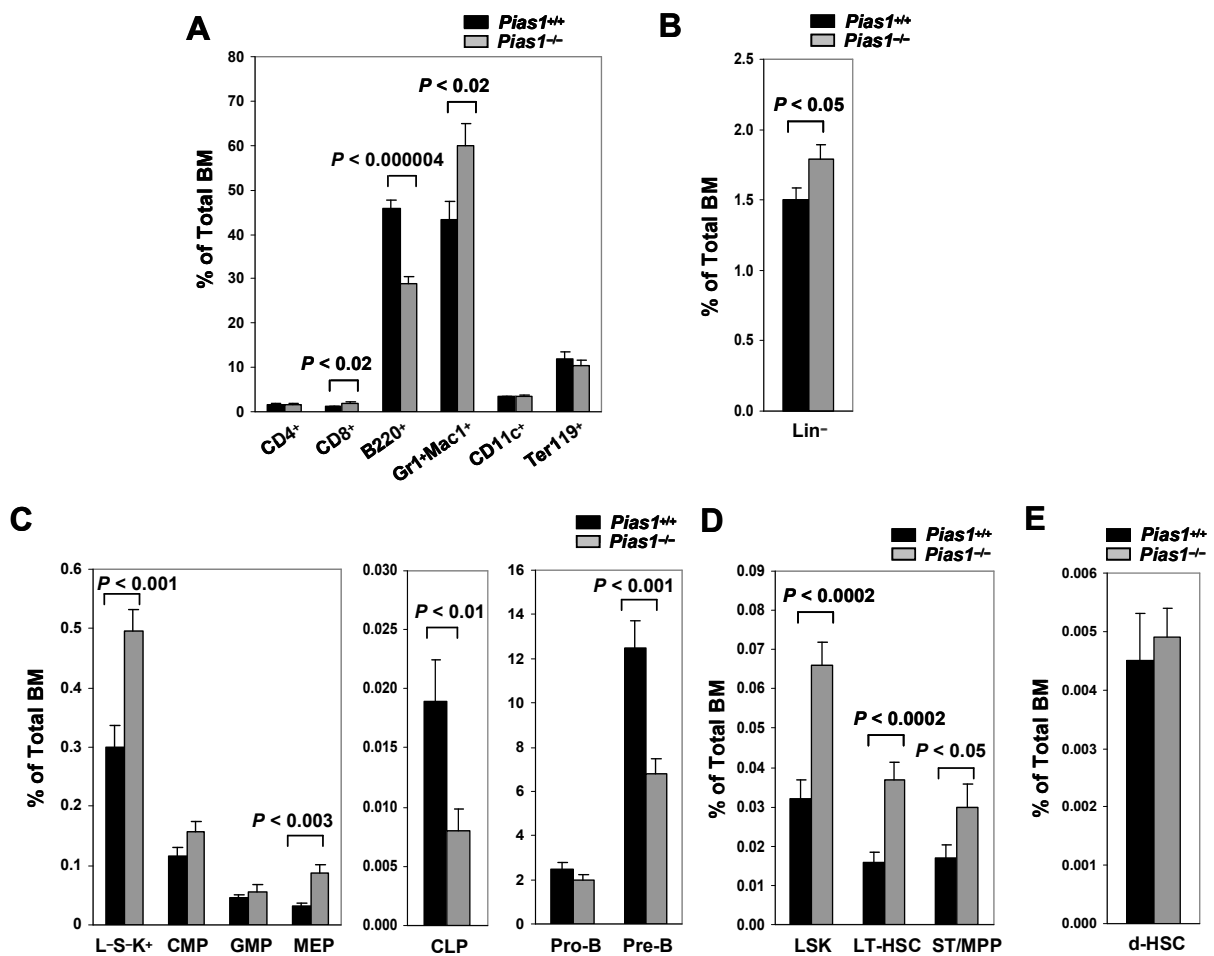

**Figure S2.** Altered lineage-restricted progenitors and LSK populations in *Pias1*<sup>-/-</sup> mice. **(A)** Percentage of T cells (CD4<sup>+</sup> or CD8<sup>+</sup>), B cells (B220<sup>+</sup>), granulocytes/monocytes (Gr1<sup>+</sup>Mac1<sup>+</sup>), dendritic cells (CD11c<sup>+</sup>) and erythroids (Ter119<sup>+</sup>) in freshly isolated bone marrow (BM) from 8-12 weeks old WT (*Pias1*<sup>+/+</sup>) and *Pias1*<sup>-/-</sup> littermates were assayed by flow cytometry. **(B)** Same as in **A** except that frequencies of myeloid-restricted Lin<sup>-</sup>Sca1<sup>-</sup>c-Kit<sup>+</sup> (L<sup>-</sup>S<sup>-</sup>K<sup>+</sup>) populations, common myeloid progenitors (CMP), granulocyte monocyte progenitors (GMP), megakaryocyte erythrocyte progenitors (MEP), common lymphoid progenitors (CLP), Pro-B and Pre-B cells as defined in Supplementary Materials and Methods were assayed. **(C)** Same as in **A** except that cell numbers of LSK, long-term hematopoietic stem cells (LT-HSC) and short-term multi-potent progenitors (ST/MPP) in total BM as defined in Supplementary Materials and Methods were assayed. **(D)** Same as in **A** except that the percentage of Lin<sup>-</sup> population was assayed. **(E)** Same as in **A** except that the percentage of dormant hematopoietic stem cells (d-HSCs; Lin<sup>-</sup>Sca1<sup>+</sup>c-Kit<sup>+</sup>CD150<sup>+</sup>CD48<sup>-</sup>CD34<sup>-</sup>) was assayed. Shown in each panel is a pool of 3 independent experiments (n=9-13). Error bars represent SEM. *P* values were determined by non-paired *t*-test.

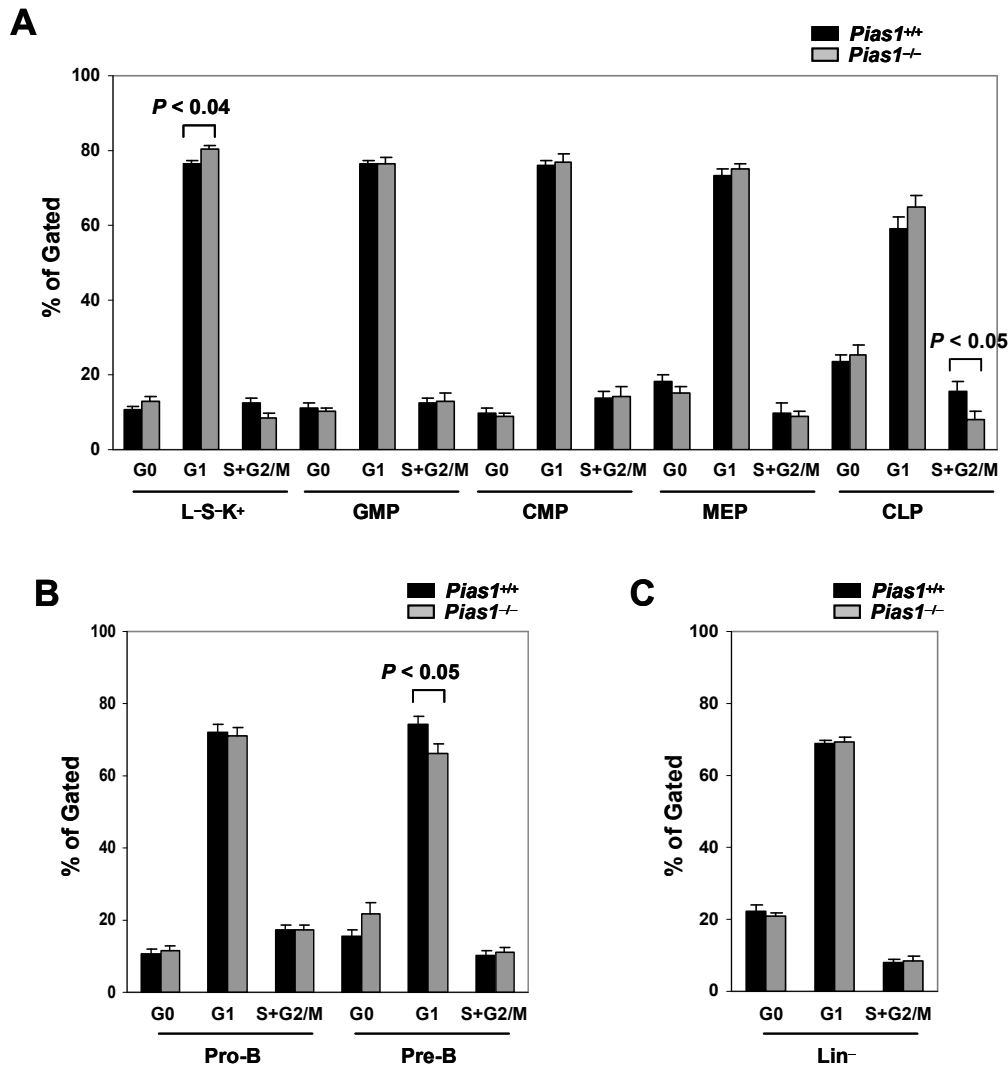

**Figure S3.** Normal cell proliferation of various progenitor populations. **(A)** Cell proliferation of indicated BM subsets from WT and *Pias1*<sup>-/-</sup> mice as defined in Supplementary Materials and Methods was revealed by intracellular Ki67 (icKi67) and Hoechst DNA staining followed by flow cytometry. G0, icKi67<sup>-</sup>, 2N DNA content; G1, icKi67<sup>+</sup>, 2N DNA content; S+G2/M, icKi67<sup>+</sup>, > 2N DNA content. **(B)** Same as in **A** except that Pro-B and Pre-B cells were assayed. **(C)** Same as in **A** except that Lin<sup>-</sup> cells were assayed. Shown in each panel is a pool of 3 independent experiments (n=10-13). Error bars represent SEM. *P* values were determined by non-paired *t*-test.

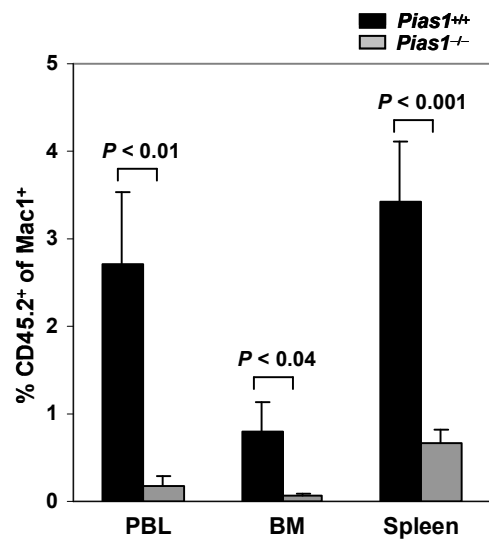

**Figure S4.** Defective short-term reconstitution capability of *Pias1*<sup>-/-</sup> myeloid-restricted Lin<sup>-</sup>Sca1<sup>-</sup>c-Kit<sup>+</sup> (L<sup>-</sup>S<sup>-</sup>K<sup>+</sup>) cells revealed by *in vivo* short-term competitive reconstitution assays. FACS-sorted L<sup>-</sup>S<sup>-</sup>K<sup>+</sup> cells (10,000) from WT or *Pias1*<sup>-/-</sup> littermates (CD45.2<sup>+</sup>) were mixed with 2x10<sup>5</sup> of WT C57S/JL bone marrow (BM) cells (CD45.1<sup>+</sup>) and injected into lethally irradiated WT C57S/JL mice. The percentage of myeloid cells (Mac1<sup>+</sup>) from donor mice in peripheral blood (PBL), BM and spleen were assayed by flow cytometry 13 days post reconstitution. Shown is a pool of 3 independent experiments in all panels (n=10). Error bars represent SEM. *P* values were determined by non-paired *t*-test.



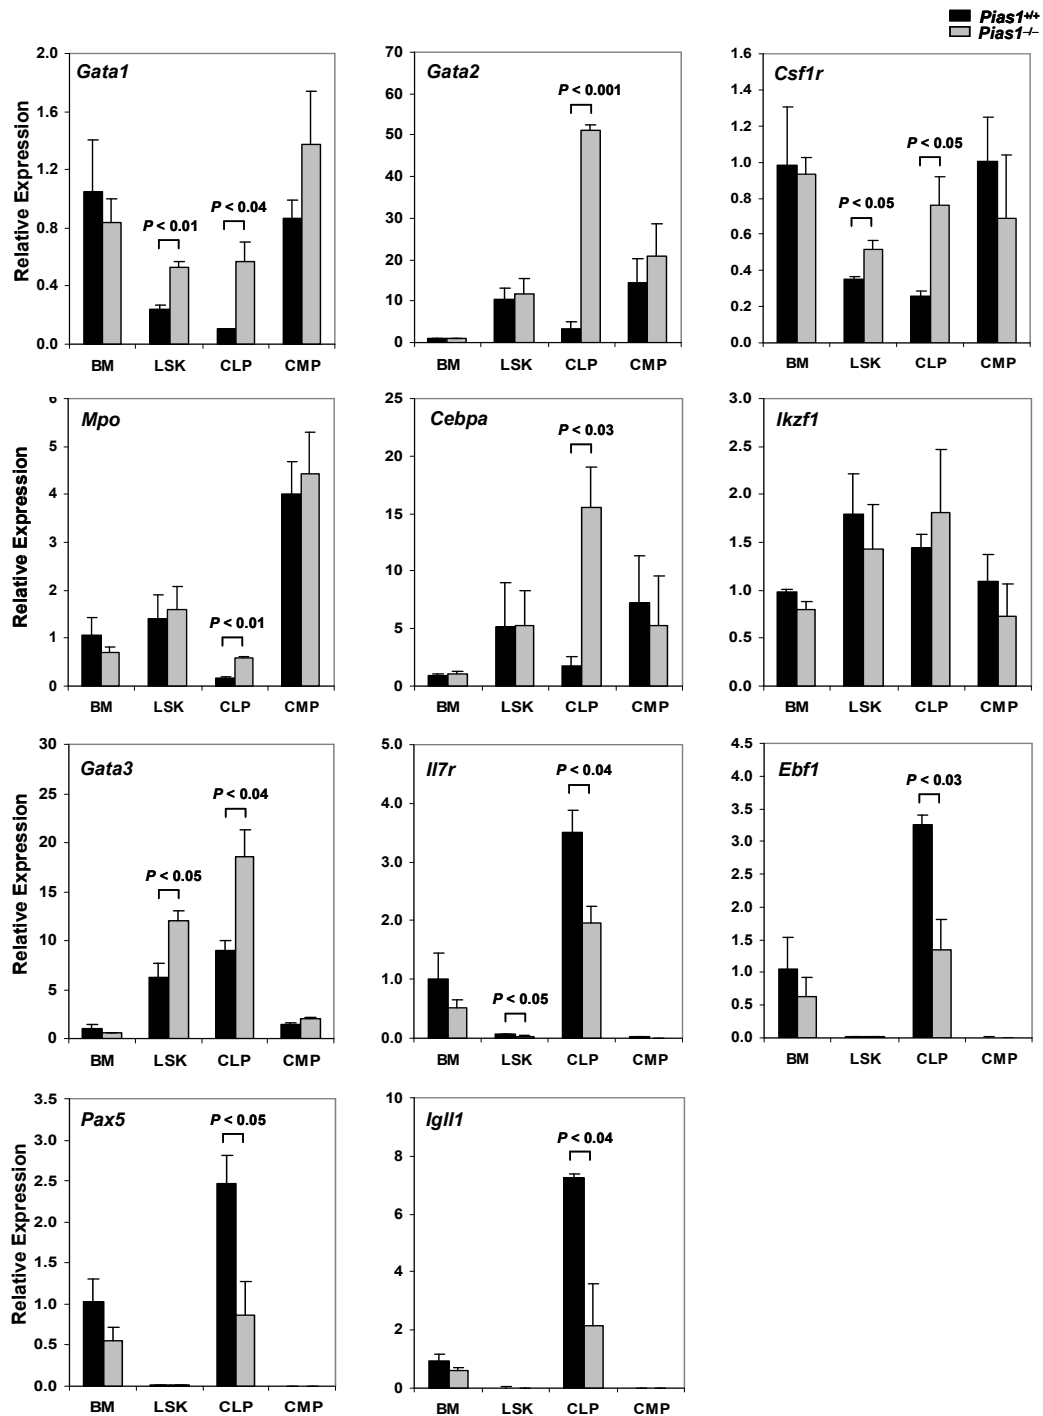

**Figure S5.** Transcription of the lineage-affiliated genes is regulated by PIAS1. Quantitative real time polymerase chain reaction (Q-PCR) analyses were performed with total RNA from WT or *Pias1*<sup>-/-</sup> bone marrow (BM), or FACS-sorted HSC-enriched Lin<sup>-</sup>Sca1<sup>+</sup>c-Kit<sup>+</sup> (LSK), common lymphoid progenitors (CLP) and common myeloid progenitors (CMP) as defined in Supplementary Materials and Methods, using gene-specific primers. Each gene is indicated at the top left of each panel, and the results were adjusted by *Hprt1*. Shown is the average of 2 independent experiments (n=5 for each experiment). Error bars represent SD. *P* values were determined by non-paired *t*-test.

## References

- Liu, B., Mink, S., Wong, K.A., Stein, N., Getman, C., Dempsey, P.W., Wu, H. and Shuai, K. (2004) PIAS1 selectively inhibits interferon-inducible genes and is important in innate immunity. *Nat. Immunol.*, **5**, 891-898.
- Yang, L., Bryder, D., Adolfsson, J., Nygren, J., Mansson, R., Sigvardsson, M. and Jacobsen, S.E. (2005) Identification of Lin(-)Sca1(+)kit(+)CD34(+)Flt3- short-term hematopoietic stem cells capable of rapidly reconstituting and rescuing myeloablated transplant recipients. *Blood*, **105**, 2717-2723.
